1                   **JUDGEMENT BIAS DURING PREGNANCY IN DOMESTIC PIGS**

2                   **Emily V. Bushby<sup>1,2</sup>, Sheena C. Cotter<sup>1</sup>, Anna Wilkinson<sup>1</sup>, Mary Friel<sup>1</sup> & Lisa M.**

3                                           **Collins<sup>\*1,2</sup>.**

4

5           1. School of Life Sciences, University of Lincoln, Lincoln, LN6 7DL

6           2. School of Biology, Faculty of Biological Sciences, University of Leeds, Leeds, LS2 9JT.

7

8           *Corresponding author:* Professor Lisa M. Collins

9           *Current address:* School of Biology, Faculty of Biological Sciences, University of Leeds,

10          Leeds, LS2 9JT.

11          *Tel:* + 44 11 33 43 59 40

12          *Email:* [L.Collins@leeds.ac.uk](mailto:L.Collins@leeds.ac.uk)

13 **Abstract**

14 In humans and rats, changes in mood and affect are known to occur during pregnancy, however  
15 it is unknown how gestation may influence mood in other non-human mammals. This study  
16 assessed changes in pigs' judgment bias as a measure of affective state throughout gestation.  
17 Pigs were trained to complete a spatial judgement bias task with reference to positive and  
18 negative locations. We tested gilts before mating, and during early and late pregnancy, by  
19 assessing their responses to ambiguous probe locations. Pigs responded increasingly negatively  
20 to ambiguous probes as pregnancy progressed and there were consistent inter-individual  
21 differences in baseline optimism. This suggests that the pigs' affective state may be altered  
22 during gestation, although as a non-pregnant control group was not tested, an effect of learning  
23 cannot be ruled out. These results suggest that judgement bias is altered during pregnancy in  
24 domestic pigs, consequently raising novel welfare considerations for captive multiparous  
25 species.

26

27 **Keywords:**

28 Pregnancy; Gestation; Cognitive bias; Affective state; Information processing; Pig.

29 **Background**

30 Research investigating the links between pregnancy, affect and cognition is most often carried  
31 out with a human-centric focus with studies typically using case studies and cohorts. In  
32 humans, changes in affective state during pregnancy are common and alterations in levels of  
33 anxiety, depression and cognitive ability have been demonstrated in humans and rodents [1-  
34 3]. These changes are often linked to the large and rapid hormone fluctuations that occur  
35 during the gestational period [4-5]. Where human subjects cannot be used, rodent models are  
36 often employed to experimentally investigate how factors such as diet, enrichment or stress  
37 can influence behaviour during pregnancy [6-8]. To infer anxiety and depressive-like  
38 behaviours, lab-based behavioural tests, such as a forced swim or open-field test are often  
39 used [9]. These studies are conducted under laboratory conditions and are generally aimed at  
40 modelling human gestation, rather than investigating how gestation may impact on the rodent  
41 itself. Results from both human and rodent studies are varied, however most show that

42 affective state is altered throughout gestation (for review see [2]) and it is clear that  
43 pregnancy impacts maternal affective state.  
44  
45 Understanding an animals' affective state, or emotion and mood, is a key component of  
46 animal welfare [10]. Affective state can influence and alter cognitive processes, such as  
47 judgement, [11-12] which may then be used to infer and understand an animals' affective  
48 state. Cognitive bias or judgement bias is the influence of affect on information processing,  
49 with more content individuals likely to make positive assumptions about ambiguous stimuli  
50 [13]. Judgement bias tests have been used to assess changes in affective state in a range of  
51 species, including pigs, dogs, honeybees and European starlings [14-17]. Research typically  
52 focuses on the impact of external stimuli on judgement bias; this is likely to act via alteration  
53 to the internal, physiological environment ultimately resulting in changes in behaviour and  
54 judgement bias [11; 18-19]. As such, we would expect internal stimuli, such as physiological  
55 changes, would also impact judgement bias directly even in the absence of external  
56 influences. Pregnancy is one of the biggest physiological changes a mammal may experience,  
57 involving major hormonal and cognitive adjustments [20-21], yet little is known of how  
58 information processing and affective state may change in relation to pregnancy in animals.  
59  
60 The domestic pig (*Sus scrofa domesticus*) has been used as a human model in a wide range of  
61 medical research such as infectious disease [22], nutritional [23] and neurological studies [24].  
62 Pigs allow for longer lifespan studies and are more similar to humans than other laboratory  
63 species, such as rodents [25-26]. More commonly, pigs are farmed around the globe for meat  
64 production. Modern intensive farming systems have been designed to produce food as quickly  
65 and cost efficiently as possible, and research is continually ongoing to understand how animal  
66 welfare can be optimised within these systems. Despite many studies on the behavioural and  
67 welfare needs of sows during pregnancy [27-30], only one study used a specific judgement bias  
68 task to assess affective state in gestating sows. This study focused on whether judgement bias  
69 could be used as a welfare indicator in gestating sows, finding that group-housed, gestating

70 sows can learn a go/no-go judgement bias task and individual affective states can differ despite  
71 experiencing the same management conditions [31]. However, this study did not investigated  
72 how gestation itself influenced judgement bias. More recently another study showed that  
73 gestating gilts that were classified as 'friendly' visited an electronic sow feeder more often than  
74 individuals that were classified as 'fearful' [32]. The authors hypothesised that this feeding  
75 behaviour may be similar to a judgement bias task and that the friendly individuals may have  
76 been more optimistic. However, again this study did not investigate how gestation itself  
77 influenced judgement bias.

78

79 We investigated how gestation may alter judgement, and therefore affective state, in domestic  
80 pigs. We compared within- and between-individual affective state, as measured by a spatial  
81 judgement bias test, before mating, and during early and late pregnancy. We hypothesised that  
82 within-individual judgement bias would be more pessimistic during pregnancy than prior to  
83 mating, leading to an increase in latency to approach ambiguous cues throughout pregnancy.  
84 This is the first study to our knowledge to investigate the possible impact of gestation on  
85 judgement bias in domestic pigs.

## 86 **Methods and materials**

87 This work was carried out between July and October 2015 (replicate one) and between January  
88 and July 2017 (replicate two) on a pig farm in the UK.

### 89 **Animal housing and husbandry**

90 20 gilts (primiparous female pigs; N=10 for each replicate) were selected based on age and time  
91 until first mating. Using gilts allowed for training time before gestation, as there is limited time  
92 between pregnancies once a sow has begun breeding. The average age of all 20 pigs on day one  
93 of training was 241.7 (SE: 3.56) days. Replicate two contained one Duroc and three Landrace  
94 pigs, the breed of all other individuals was Large White. Pigs were housed in pens of five or  
95 six animals, each pen (4.67m x 5.35m) contained a sheltered sleeping area with straw bedding

96 (2.70 x 4.67m) and a run partially exposed to outdoor elements, such as wind and natural light  
97 (2.65 x 4.67m). A standard lactating sow ration was fed once a day before mating and  
98 throughout gestation; there was continuous access to water and natural lighting. During the  
99 course of the study the animals remained within the same groups and pens to keep the external  
100 environment as controlled as possible throughout. The study pigs were able to interact with  
101 pigs in the pen next door via the gate and animals in the neighbouring pens may have been  
102 moved/changed. Due to involvement in a separate study, replicate one pigs received  
103 Regumate® (containing a steroidal progestin) orally with feed 23 days before planned estrus to  
104 allow for synchronised farrowing. As of June 2020, no previous research was found  
105 investigating possible effects of Regumate® on affective state or behaviour of pigs. Due to this  
106 research taking place on a working farm, it was not possible to test a non-pregnant control  
107 group

#### 108 **Judgement bias**

109 All pigs were habituated to the test arena in groups for two to three sessions, and then  
110 individually to habituate the pigs to eating from the bowl which was placed in the centre of the  
111 test arena. Following this, individuals were trained to associate the bowl location with a positive  
112 (P) and a negative (N) outcome. When in the P location, the bowl contained a small amount of  
113 chocolate raisins (replicate 1) or sugar-coated chocolates (replicate 2) and when it was in the N  
114 location, the bowl contained unpalatable food (bitter tasting coffee beans) to discourage the  
115 pigs from approaching this location. The pigs were trained to discriminate between these  
116 reference locations by alternating P and N trials. Latency to reach the bowl was recorded using  
117 video cameras and was then used as a metric to assess whether each individual had learned the  
118 discrimination. Each trial was 30 seconds in duration. Correct responses were recorded when  
119 the subject approached and touched their nose to the bowl during the positive (P) trials; during  
120 negative (N) trials, a correct response was recorded when the individual did not approach the  
121 bowl within 30 seconds. The location of P and N was counterbalanced across individuals. For  
122 both replicates a criterion of 70% correct responses in the last 20 trials was required before

123 moving onto the testing phase. Per individual, forty-four training trials were conducted during  
124 replicate one and sixty-two for replicate two. Replicate two required more training trials due to  
125 the pigs being slower to differentiate between the positive and negative locations. Five pigs  
126 from replicate one failed to meet this criterion and were removed from the study. Two pigs  
127 from replicate 2 did not meet this criterion. The analysis represents only those 13 that met the  
128 learning criterion.

129

130 Each testing session comprised two sets of nine trials carried out on the same day, involving  
131 five different bowl locations; the P and N reference locations and three intermediate ambiguous  
132 probes: near positive (NP), middle (M) and near negative (NN). Only one bowl was in the arena  
133 during each trial. The ambiguous probes placed in predetermined equidistant positions (0.74m)  
134 and were not reinforced (i.e., they were left empty). They were presented in a pseudo-  
135 randomised order and interspersed among training trials. All ‘during pregnancy’ testing  
136 sessions were preceded by five ‘reminder’ training trials the day before testing. Each pig was  
137 tested three times: before gestation (1-2 weeks before mating); early gestation (4 weeks after  
138 mating); and late gestation (10-11 weeks after mating). One pig in replicate two was not tested  
139 before gestation and was only tested in the early and late test phases.

140

#### 141 **Statistical analysis**

142 All data were analysed in R version 3.4.1 using general linear mixed effects models with the  
143 *lmer* function in the package *lme4* [33]. To test the effects of gestation time on cognitive bias,  
144 the response variable was *time taken to approach* the presented probes; fixed explanatory  
145 effects were *probe location*, coded as a continuous variable from positive (1) to negative (5)  
146 with ambiguous locations at points 2, 3 and 4; and *gestation time* coded as a factor with three  
147 levels (pre, early and late gestation). *Probe location squared* was included as initial data  
148 exploration suggested curvature in the fits. Interactions between *gestation time* and *probe*  
149 *location* and *probe location squared* were also included.

150

151 To find the most appropriate structure for the random model, we compared eight models: two  
152 intercept only models and six combinations of random intercept and slope models such that  
153 random intercepts were fitted for each pig at each experimental timepoint (or for each pig  
154 independent of experimental replicate), with variation allowed between gestation times and the  
155 shape of the curve was allowed to vary between pigs (Table 1).

156

157 The Akaike Information Criteria (AIC) values for all models were compared using the  
158 *model.sel* function in the *MuMIn* package [34]. In each case the residuals of the final minimal  
159 model were visually assessed for deviations from normality. For the final models, predicted fits  
160 were produced using the *predict* function in base R.  $R^2$  values for each model were calculated  
161 using the *r.squaredGLMM* function in the *MuMIn* package [34]. For every model, the general  
162 pattern of results was robust, with the different random models only affecting the predictions  
163 very slightly. The best model is reported in the main text, and the results and corresponding  
164 figures for the two models where AIC comparison had  $\Delta < 2$  are reported as supplementary  
165 information.

## 166 **Results**

### 167 *Judgement Bias*

168 The pigs' responses to ambiguous locations in the cognitive bias test changed throughout  
169 gestation (Tables 2, 3; Figure 1). Pigs consistently approached the positive probe quickly and  
170 the negative probe slowly (or not at all), getting generally slower during gestation (Figure 1).  
171 However, whilst the mean speed of approach was fairly linear between positive and negative  
172 pre- and early gestation (Figure 1a,b), by late gestation, pigs showed a shift towards pessimism,  
173 such that the positive probe continued to be approached quickly but ambiguous probes were  
174 approached more slowly (Figure 1c).

175

176 All models retained all interactions and gave qualitatively similar results. The best model was  
177 model 1, where the intercept was allowed to vary for each pig at each gestation time (Table 1).

178 However, the result for model 2, where the intercept was allowed to vary for each pig at each  
 179 gestation time, within each replicate, was equally well supported ( $\Delta AIC < 2$ ; Table 2, Figure  
 180 S1).

181

182 **Table 1: Statistical model details.** Random models with fixed slopes (models 1 and 2) or  
 183 slopes allowed to vary across probe location (models 3-8), with experimental replicate included  
 184 (models 2,4,6 and 8) or not (models 1,3,5 and 7).

| Model | Random slope                   | Random intercept                |
|-------|--------------------------------|---------------------------------|
| 1     | 1                              | Gestation time:Pig ID           |
| 2     | 1                              | Replicate/Gestation time:Pig ID |
| 3     | Location                       | Gestation time:Pig ID           |
| 4     | Location                       | Replicate/Gestation time:Pig ID |
| 5     | Location <sup>2</sup>          | Gestation time:Pig ID           |
| 6     | Location <sup>2</sup>          | Replicate/Gestation time:Pig ID |
| 7     | Location+Location <sup>2</sup> | Gestation time:Pig ID           |
| 8     | Location+Location <sup>2</sup> | Replicate/Gestation time:Pig ID |

185

186 **Table 2: Table of candidate LMERS.** Table of candidate LMERS explaining time to  
 187 approach the probe in relation to the interaction between the location of the presented probe  
 188 and the gestation time for pigs that reached the 70% learning criterion only (n=13). Each  
 189 model retained all fixed terms (Location\*Gestation time+Location<sup>2</sup>\*Gestation time) with only  
 190 the random model varying. *Model* corresponds to the random model listed in Table 1,  $AIC_c$  =  
 191 corrected Akaike Information Criteria values;  $\Delta AIC_c$  = difference in  $AIC_c$  values between the  
 192 best model (lowest  $AIC_c$ ) and the given model;  $w$  = Akaike weights;  $r^2$  (F only) =  $r^2$  for the  
 193 fixed model only,  $r^2$  (F+R)  $r^2$  for the fixed plus random model.

| Model | df | $AIC_c$ | $\Delta AIC_c$ | w     | $r^2$ (F only) | $r^2$ (F+R) |
|-------|----|---------|----------------|-------|----------------|-------------|
| 1     | 12 | 215.2   | 0.00           | 0.580 | 0.751          | 0.805       |
| 2     | 11 | 216.9   | 1.72           | 0.245 | 0.748          | 0.806       |
| 3     | 16 | 219.7   | 4.50           | 0.061 | 0.751          | 0.805       |
| 5     | 13 | 219.8   | 4.57           | 0.059 | 0.751          | 0.805       |
| 7     | 13 | 221.2   | 6.01           | 0.029 | 0.750          | 0.818       |
| 4     | 22 | 222.2   | 7.02           | 0.017 | 0.738          | 0.810       |



|          |    |       |       |       |       |       |
|----------|----|-------|-------|-------|-------|-------|
| <b>6</b> | 16 | 224.1 | 8.89  | 0.007 | 0.740 | 0.817 |
| <b>8</b> | 16 | 227.5 | 12.35 | 0.001 | 0.729 | 0.833 |

194

195

196 **Table 3: Results of the best supported statistical models.** Minimum adequate linear mixed  
 197 effects model for the effects of probe location and gestation time on the time taken for pigs to  
 198 approach the probe under testing, for pigs that reached the 70% learning criteria only (n=13).  
 199 The results equate to the best supported random models.

| Term                                        | Model 1 |       |        | Model 2 |       |        |
|---------------------------------------------|---------|-------|--------|---------|-------|--------|
|                                             | DF      | F     | P      | DF      | F     | P      |
| <b>Location</b>                             | 1, 141  | 62.96 | <0.001 | 1, 141  | 62.96 | <0.001 |
| <b>Gestation time</b>                       | 2, 168  | 2.03  | 0.134  | 2, 167  | 2.04  | 0.133  |
| <b>Location<sup>2</sup></b>                 | 1, 141  | 9.57  | 0.002  | 1, 141  | 9.57  | 0.002  |
| <b>Location: Gestation time</b>             | 2, 141  | 6.07  | 0.003  | 2, 141  | 6.07  | 0.003  |
| <b>Location<sup>2</sup>: Gestation time</b> | 2, 141  | 6.16  | 0.003  | 2, 141  | 6.16  | 0.003  |

200

201 **Figure 1: The time to approach each location at three stages of gestation.** Log time taken  
202 to approach each location for pigs at three different stages of the pig's 16-week gestational  
203 period; a) pre-gestation, b) early gestation (5 weeks) and c) late gestation (10-11 weeks). The  
204 open circles are raw datapoints and the lines are model predictions from the minimal adequate  
205 model fixed to the level of experimental replicate 1. Results from model 2 are shown, where  
206 the intercept is allowed to vary for each pig at each gestation time, within each replicate. Pigs  
207 1-5 are from replicate 1 and pigs 6-15 are from replicate 2.  
208

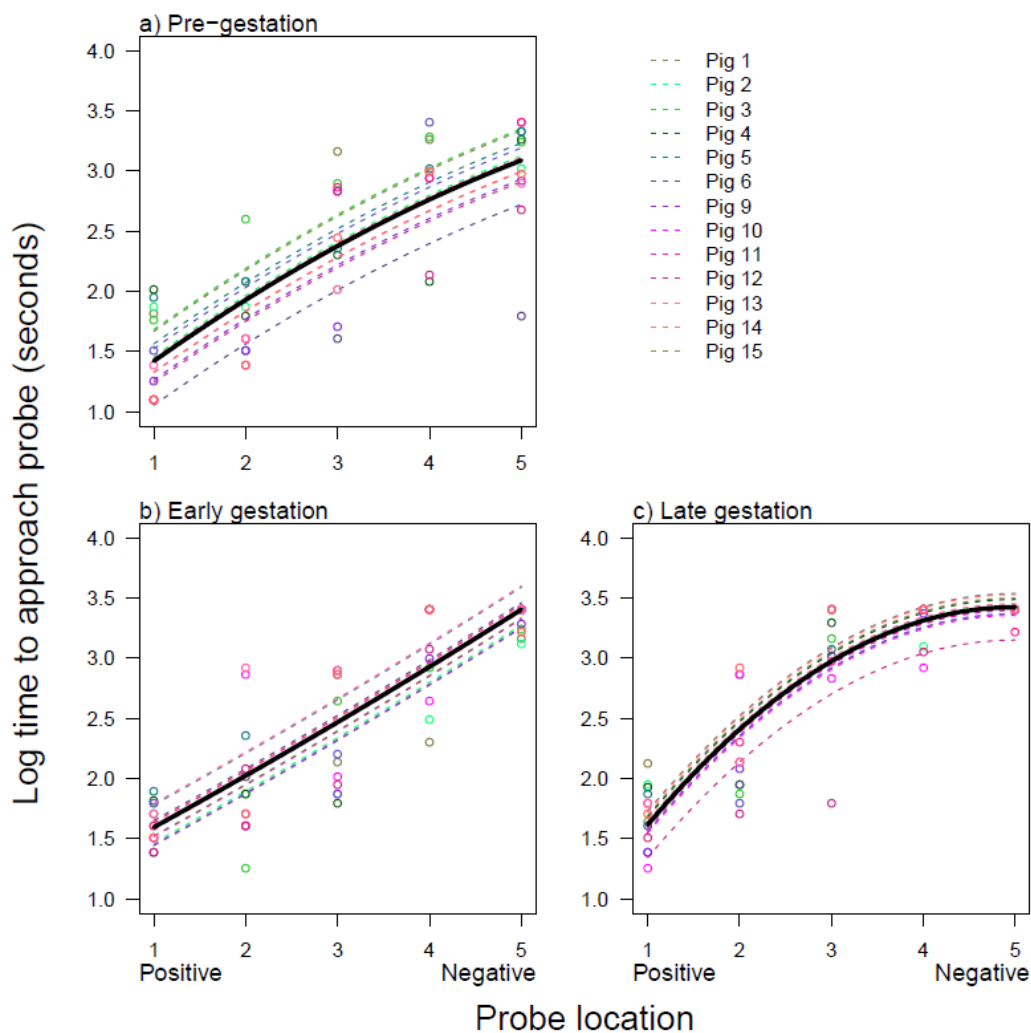

209  
210

## 211 **Discussion**

212 Commercially farmed breeding pigs often experience multiple consecutive pregnancies  
213 throughout their lifespan. In livestock species judgement bias tasks have most commonly been  
214 used to assess the impact of external factors on affective state. However, internal factors, such  
215 as the large physiological changes as associated with pregnancy, also have the potential to  
216 influence affective state and therefore judgement bias. The aim of this study was to assess  
217 judgement bias in domestic pigs throughout gestation. It was hypothesised that the gilts would  
218 be more pessimistic during pregnancy than prior to mating, as indicated by an increase in  
219 latency to approach the ambiguous cues. Our results showed this to be the case, with the gilts  
220 taking longer to approach the ambiguous locations in the later stage of gestation than before  
221 mating which indicates that judgement bias changed as gestation progressed. This was most  
222 apparent at the middle and most ambiguous location (Figure 1) and suggests the pigs were more  
223 pessimistic during the late gestational stage. Crucially, the latency to reach the positive location  
224 did not vary markedly throughout gestation, showing that other changes, for example, increase  
225 in weight, did not affect response latencies (Figure 1). Thus, these results show increased  
226 pessimism during the late stage of pregnancy, despite the fact that the immediate external  
227 environment remained constant. This infers that, alongside external factors, internally-driven  
228 factors can also influence judgement bias and affective state in domestic pigs.

229

230 The possibility that pigs' judgement bias may change from a positive to a more negative state  
231 during the late stage of gestation suggests that the pigs' welfare needs may change too. This  
232 highlights the importance of considering the impact of large physiological changes, such as  
233 pregnancy, on animal welfare. This study may have implications, not only for the welfare of  
234 farmed animals that experience gestation, but also for research into affective state during  
235 pregnancy in other captive multiparous mammalian species, including how this may impact  
236 cumulatively across the life course on their health and welfare. For example, in humans,  
237 multiparous women appear to be more at risk and have a different pattern of anxious or

238 depressive symptoms compared to primiparous women [35-36]. In humans, hormone  
239 fluctuations and other physiological changes throughout pregnancy are often correlated with  
240 changes in mood and affective state [4-5]. Pigs are frequently used as models for humans in  
241 medical and pharmaceutical studies [22-23; 39-40], so it is possible that a change in affective  
242 state during gestation may be caused by comparative mechanisms, however, further research is  
243 required to validate this.

244

245 Alongside this interesting result, there are some limitations to take into consideration. Previous  
246 studies have shown that multiple testing time points can result in an increase in pessimistic  
247 responses [37-38] and this increase in latencies during the later testing phases is similar to what  
248 was found in this study. As it was not possible to test a non-pregnant control group, this effect  
249 of learning cannot be ruled out. However, the effects of gestation represent a plausible driver  
250 for the changes in affect we report as previous research in rodents and humans has shown that  
251 mood and affective state can vary throughout gestation [1-3]. Future studies should consider  
252 the role of learning by including a non-pregnant control group. There were also some  
253 differences between replicates, such as one replicate receiving Regumate®, and different  
254 rewards being used. Despite this, the effect of replicate on the data was marginal (Figure 1),  
255 showing that the change in judgement bias over the course of pregnancy was robust and not  
256 influenced by these differences between replicates.

257

258 In conclusion, this study shows that judgement bias in farmed domestic pigs may change with  
259 stage of gestation, inferring that internally driven stimuli can directly affect judgement bias  
260 without external influence. This study raises novel welfare considerations for captive  
261 multiparous species and provides a basis for future research into the effect of gestation on  
262 judgement bias in non-human animals.

263

264 **References**

- 265 [1] Macbeth, A.H., Gautreaux, C. & Luine, V.N. (2008) Pregnant rats show enhanced spatial  
266 memory, decreased anxiety, and altered levels of monoaminergic neurotransmitters. *Brain*  
267 *research*, 1241,136-147. doi: 10.1016/j.brainres.2008.09.006  
268
- 269 [2] Macbeth, A.H. & Luine, V.N. (2010) Changes in anxiety and cognition due to  
270 reproductive experience: a review of data from rodent and human mothers. *Neuroscience &*  
271 *Biobehavioral Reviews*, 34, 452-467. doi: 10.1016/j.neubiorev.2009.08.011  
272
- 273 [3] Ferreira, C.R., Orsini, M.C., Vieira, C.R., do Amarante Paffaro, A.M. & Silva, R.R.  
274 (2015) Prevalence of anxiety symptoms and depression in the third gestational trimester.  
275 *Archives of gynecology and obstetrics*, 291, 999-1003. doi: 10.1007/s00404-014-3508-x  
276
- 277 [4] Workman, J.L., Barha, C.K. & Galea, L.A.M. (2011) Endocrine Substrates of Cognitive  
278 and Affective Changes During Pregnancy And Postpartum. *Behavioural Neuroscience*, 126,  
279 54-72. Doi: 10.1037/a0025538  
280
- 281 [5] Uguz, F., Gezginc, K., Kayhan, F., Sari, S. & Buyukoz, D (2010) Is Pregnancy Associated  
282 With Mood And Anxiety Disorders? A Cross-Sectional Study. *General Hospital Psychiatry*,  
283 32, 213 – 215. Doi: 10.1016/j.genhosppsy.2009.11.002  
284
- 285 [6] Tang, M., Liu, Y., Wang, L., Li, H., Cai, H., Zhang, M., Dang, R., Xue, Y. & Wu, Y.,  
286 (2018) An  $\Omega$ -3 fatty acid-deficient diet during gestation induces depressive-like behavior in  
287 rats: the role of the hypothalamo–pituitary–adrenal (HPA) system. *Food & function*, 9, 3481-  
288 3488. Doi: 10.1039/c7fo01714f.  
289
- 290 [7] Rosenfeld, A. & Weller, A. (2012) Behavioral effects of environmental enrichment during  
291 gestation in WKY and Wistar rats. *Behavioural brain research*, 233(2), pp.245-255. Doi:  
292 10.1016/j.bbr.2012.05.006  
293
- 294 [8] de Brito Guzzo, S.F.C., Rafael, C., Fitipaldi, B.M., Garcia, A.A., Dias, K.V., Luiz, Y.J. &  
295 Fernando, F. (2015) Impact of chronic stressors on the anxiety profile of pregnant  
296 rats. *Physiology & behavior*, 142, 137-145. Doi: 10.1016/j.physbeh.2015.02.014  
297
- 298 [9] Belovicova, K., Bogi, E., Csatlosova, K. & Dubovicky, M. (2017) Animal tests for  
299 anxiety-like and depression-like behavior in rats. *Interdisciplinary toxicology*, 10, 40-43. Doi:  
300 10.1515/intox-2017-0006  
301
- 302 [10] Mendl, M., Burman, O.H. and Paul, E.S., 2010. An integrative and functional framework  
303 for the study of animal emotion and mood. *Proceedings of the Royal Society B: Biological*  
304 *Sciences*, 277, pp.2895-2904. Doi: 10.1098/rspb.2010.0303  
305
- 306 [11] Mendl, M., Burman, O.H., Parker, R.M. & Paul, E.S. (2009) Cognitive bias as an  
307 indicator of animal emotion and welfare: Emerging evidence and underlying  
308 mechanisms. *Applied Animal Behaviour Science*, 118(3-4), pp.161-181. Doi:  
309 10.1016/j.applanim.2009.02.023  
310
- 311 [12] Boissy, A., Arnould, C., Chaillou, E., Désiré, L., Duvaux-Ponter, C., Greiveldinger,  
312 L., Leterrier, C., Richard, S., Roussel, S., Saint-Dizier, H., Meunier-Salaün, MC., Valance,  
313 D., Veissier, I. (2007) Emotions and cognition: a new approach to animal welfare. *Animal*  
314 *Welfare*, 16, 37 – 43.

- 315 [13] Bethell, E.J. (2015) A “how-to” guide for designing judgment bias studies to assess  
316 captive animal welfare. *Journal of Applied Animal Welfare Science*, 18, 18 - 42. doi:  
317 10.1080/10888705.2015.1075833  
318
- 319 [14] Asher, L., Friel, M., Griffin, K. & Collins, L.M. (2016) Mood and personality interact to  
320 determine cognitive biases in pigs. *Biology letters*, 12, 20160402. Doi:  
321 10.1098/rsbl.2016.0402  
322
- 323 [15] Bateson, M., Desire, S., Gartside, S.E. & Wright, G.A. (2011) Agitated honeybees exhibit  
324 pessimistic cognitive biases. *Current biology*, 21, 1070-1073. Doi:10.1016/j.cub.2011.05.017  
325
- 326 [16] Mendl, M., Brooks, J., Basse, C., Burman, O., Paul, E., Blackwell, E. & Casey, R. (2010)  
327 Dogs showing separation-related behaviour exhibit a ‘pessimistic’ cognitive bias. *Current*  
328 *Biology*, 20, R839-R840. Doi: 10.1016/j.cub.2010.08.030  
329
- 330 [17] Matheson, S.M., Asher, L. & Bateson, M. (2008) Larger, enriched cages are associated  
331 with ‘optimistic’ response biases in captive European starlings (*Sturnus vulgaris*). *Applied*  
332 *Animal Behaviour Science*, 109, 374-383. Doi: 10.1016/j.applanim.2007.03.007  
333
- 334 [18] Verbeek, E., Ferguson, D. & Lee, C. (2014) Are hungry sheep more pessimistic? The  
335 effects of food restriction on cognitive bias and the involvement of ghrelin in its  
336 regulation. *Physiology & behavior*, 123, 7-75. Doi: 10.1016/j.physbeh.2013.09.017  
337
- 338 [19] Oliveira, F.R., Nogueira-Filho, S.L., Sousa, M.B., Dias, C.T., Mendl, M. & Nogueira, S.S.  
339 (2016) Measurement of cognitive bias and cortisol levels to evaluate the effects of space  
340 restriction on captive collared peccary (*Mammalia, Tayassuidae*). *Applied Animal Behaviour*  
341 *Science*, 181, 76-82. Doi: 10.1016/j.applanim.2016.05.021  
342
- 343 [20] Soldin, O.P., Guo, T., Weiderpass, E., Tractenberg, R.E., Hilakivi-Clarke, L. & Soldin,  
344 S.J. (2005) Steroid Hormone Levels In Pregnancy And 1 Year Postpartum Using Isotope  
345 Dilution Tandem Mass Spectrometry. *Fertility And Sterility*, 84, 701 –  
346 710. Doi: 10.1016/j.fertnstert.2005.02.045  
347
- 348 [21] Steiner, M., Dunn, E. & Born, L. (2003) Hormones And Mood: From Menarche To  
349 Menopause And Beyond. *Journal of Affective Disorder*, 74, 67 – 83. Doi: 10.1016/S0165-  
350 0327(02)00432-9  
351
- 352 [22] Meurens, F., Summerfield, A., Nauwynck, H., Saif, L. & Gerdtts, V. (2012) The pig: a  
353 model for human infectious diseases. *Trends in microbiology*, 20, 50-57. Doi:  
354 10.1016/j.tim.2011.11.002  
355
- 356 [23] Roura, E., Koopmans, S.J., Lallès, J.P., Le Huerou-Luron, I., De Jager, N., Schuurman,  
357 T. & Val-Laillet, D. (2016) Critical review evaluating the pig as a model for human  
358 nutritional physiology. *Nutrition research reviews*, 29, 60-90. Doi:  
359 10.1017/S0954422416000020  
360
- 361 [24] Sauleau, P., Lapouble, E., Val-Laillet, D. & Malbert, C.H. (2009) The pig model in brain  
362 imaging and neurosurgery. *Animal*, 3, 1138-1151. Doi: 10.1017/S1751731109004649  
363
- 364 [25] Flisikowska, T., Kind, A. & Schnieke, A. (2014) Genetically modified pigs to model  
365 human diseases. *Journal of applied genetics*, 55, 53-64. Doi: 10.1007/s13353-013-0182-9  
366
- 367 [26] Fan, N. & Lai, L. (2013) Genetically modified pig models for human diseases. *Journal of*  
368 *Genetics and Genomics*, 40, 67-73. Doi: 10.1016/j.jgg.2012.07.014  
369

- 370 [27] Algers, B. & Uvnäs-Moberg, K. (2007) Maternal Behaviour In Pigs. *Livestock Science*,  
371 52, 78 – 85. Doi: 10.1016/j.yhbeh.2007.03.022  
372
- 373 [28] Boyle, L.A., Leonard, F.C., Lynch, P.B. & Brophy, P. (2002) Effect Of Gestation  
374 Housing On Behaviour And Skin Lesions Of Sows In Farrowing Crates. *Applied Animal*  
375 *Behaviour Science*, 76, 119 – 134. Doi: 10.1016/S0168-1591(01)00211-8  
376
- 377 [29] Damm, B.I., Lisborg, L., Vestergaard, K.S. & Vanicek, J. (2003) Nest-Building,  
378 Behavioural Disturbances And Heart Rate In Farrowing Sows Kept In Crates And Schmid  
379 Pens. *Livestock Science*, 80, 175 – 187. Doi: 10.1016/S0301-6226(02)00186-0  
380
- 381 [30] Wischner, D., Kemper, N., & Krieter, J. (2009) Nest-Building Behaviour In Sows And  
382 Consequences For Pig Husbandry. *Livestock Science*, 124, 1 – 8. Doi:  
383 10.1016/j.livsci.2009.01.015  
384
- 385 [31] Horback, K.M. & Parsons, T.D (2019) Judgement bias testing in group-housed gestating  
386 sows. *Behavioural processes*, 159, 86-92. Doi: 10.1016/j.beproc.2018.12.021  
387
- 388 [32] Rooney, H.B., Schmitt, O., Courty, A., Lawlor, P.G. and O’Driscoll, K., 2021. Like  
389 Mother Like Child: Do Fearful Sows Have Fearful Piglets? *Animals*, 11, 1232. Doi:  
390 doi.org/10.3390/ani1105123210.1080/01674820701701546  
391
- 392 [33] R Core Team (2017). R: A language and environment for statistical computing. R  
393 Foundation for Statistical Computing, Vienna, Austria. URL: <https://www.R-project.org/>.  
394
- 395 [34] Bartoń, K. (2018). MuMIn: Multi-Model Inference. R package version 1.42.1.  
396
- 397 [35] Canário, C. & Figueiredo, B. (2017) Anxiety and depressive symptoms in women and  
398 men from early pregnancy to 30 months postpartum. *Journal of reproductive and infant*  
399 *psychology*, 35, 431-449. Doi: 10.1080/02646838.2017.1368464  
400
- 401 [36] Dipietro, J.A., Costigan, K.A. & Sipsma, H.L. (2008) Continuity in self-report measures  
402 of maternal anxiety, stress, and depressive symptoms from pregnancy through two years  
403 postpartum. *Journal of Psychosomatic Obstetrics & Gynecology*, 29, 115-124.  
404
- 405 [37] Doyle, R.E., Vidal, S., Hinch, G.N., Fisher, A.D., Boissy, A. & Lee, C. (2010) The effect  
406 of repeated testing on judgement biases in sheep. *Behavioural Processes*, 83, 349-352. Doi:  
407 10.1016/j.beproc.2010.01.019  
408
- 409 [38] Murphy, E., Nordquist, R.E. & van der Staay, F.J. (2013) Responses of conventional  
410 pigs and Göttingen miniature pigs in an active choice judgement bias task. *Applied Animal*  
411 *Behaviour Science*, 148, 64-76. Doi: 10.1016/j.applanim.2013.07.011  
412
- 413 [39] Flisikowska, T., Kind, A. & Schnieke, A. (2013) The new pig on the block: modelling  
414 cancer in pigs. *Transgenic research*, 22, 673-680. Doi: 10.1007/s11248-013-9720-9  
415
- 416 [40] Verma, N., Rettenmeier, A.W. & Schmitz-Spanke, S., 2011. Recent advances in the use  
417 of *Sus scrofa* (pig) as a model system for proteomic studies. *Proteomics*, 11, 776-793. Doi:  
418 10.1002/pmic.201000320  
419  
420

421 **Acknowledgements**

422 We would like to thank the farm staff for their help and cooperation.

423 **Data accessibility**

424 Data is available as supplementary material on Dryad (Doi to be confirmed)

425 **Competing interests**

426 The authors declare no competing interests

427

428 **Author contributions:**

429 EVB carried out data collection. LMC conceived of the study; SC carried out statistical  
430 analysis; EVB, SC, AW, MF and LMC assisted with study design and coordination, drafting  
431 the final manuscript and gave final approval for publication.

432 **Ethical statement:**

433 The University of Lincoln, College of Science Ethics Committee approved this study.  
434 COSREC189, COSREC262.

435 **Funding**

436 EVB, SC and AW had no funding. LMC and MF were funded by the Biotechnology and  
437 Biological Sciences Research Council grant BB/K002554/2

438



**Supplementary Material**

**Figure S1: The latencies for all 13 pigs to approach each location during three stages of gestation.** Log time taken to approach each location for pigs at three different stages of the pig's 16-week gestational period; a) pre-gestation, b) early gestation (5 weeks) and c) late gestation (11 weeks). The open circles are raw data points and the lines are model predictions from the minimal adequate model fixed to the level of experimental replicate 1. Results from model 1 are shown, where the intercept is allowed to vary for each pig at each gestation time. Only the 13 pigs that had >70% correct responses during the learning phase are included.

bioRxiv preprint doi: <https://doi.org/10.1101/2021.06.01.446670>; this version posted August 1, 2021. The copyright holder for this preprint (which was not certified by peer review) is the author/funder, who has granted bioRxiv a license to display the preprint in perpetuity. It is made available under aCC-BY 4.0 International license.

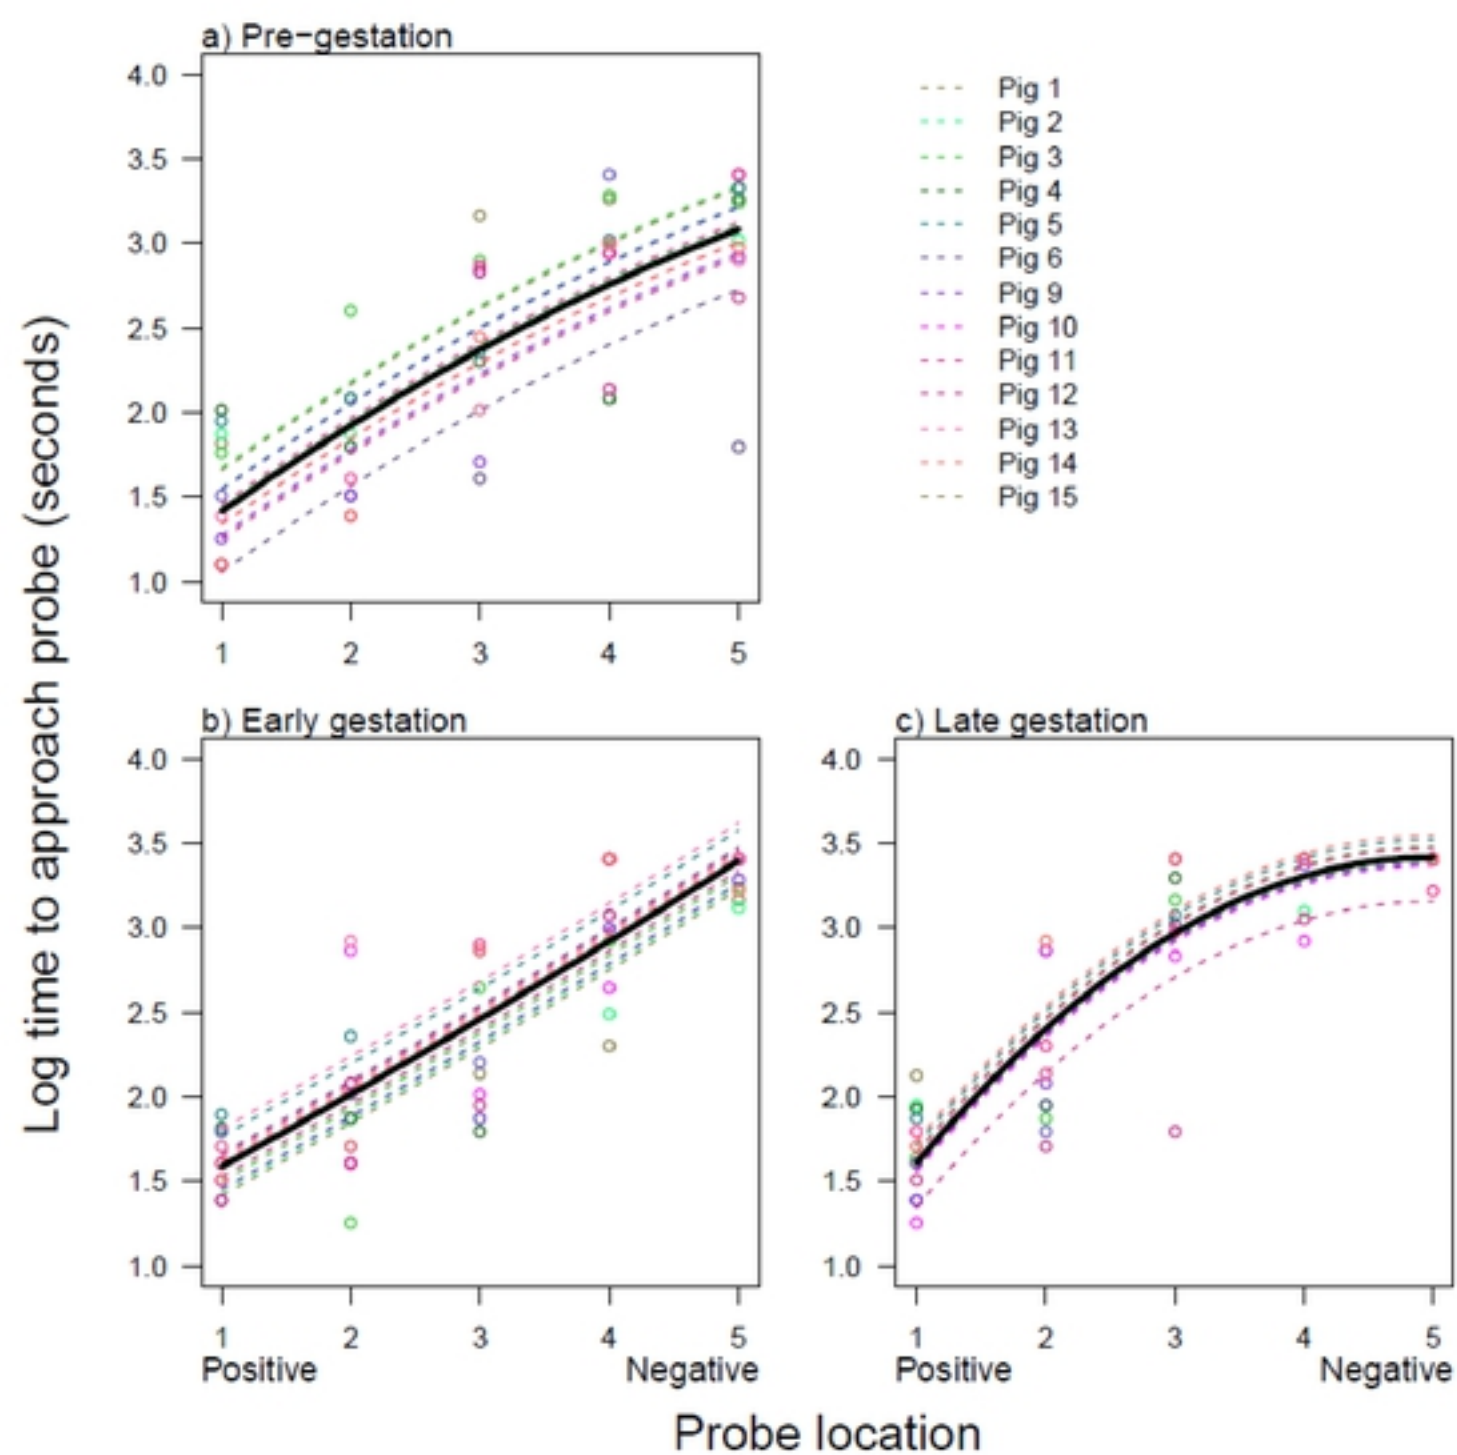

Source: https://www.biorxiv.org/content/biorxiv/early/2021/08/13/2021.08.13.456208.full.pdf
